# Supplementary material for: The unique deep sea—land connection: interactive 3D visualization and molecular phylogeny ofBathyhedyle bouchetin. sp. (Bathyhedylidae n. fam.)—the first panpulmonate slug from bathyal zones
Source: PeerJ journal article supplement (doi:10.7717/peerj.2738), 2016-12-06
Supplement: Supplementary_file_Table_S2.pdf [file Supplementary_file_Table_S2.pdf]

Table S2:

| Higher taxon            | Species                           | 18S rRNA | 28S rRNA | 16S rRNA | COI      |
|-------------------------|-----------------------------------|----------|----------|----------|----------|
| <b>EUPISTHOBRANCHIA</b> |                                   |          |          |          |          |
|                         | <i>Tylodina perversa</i>          | AY427496 | AY427458 | FJ917424 | AF249809 |
|                         | <i>Akera bullata</i>              | AY427502 | AY427466 | AF156127 | AF156143 |
|                         | <i>Aplysia californica</i>        | AY039804 | AY026366 | AF192295 | AF077759 |
| <b>PANPULMONATA</b>     |                                   |          |          |          |          |
| Sacoglossa              |                                   |          |          |          |          |
| Oxynoacea               | <i>Oxynoe antillarum</i>          | FJ917441 | FJ917466 | FJ917425 | FJ917483 |
| Plakobranchacea         | <i>Gascoignella nukuli</i>        | HQ168427 | HQ168440 | HQ168414 | HQ168452 |
| Siphonarioidea          |                                   |          |          |          |          |
| Siphonariidae           | <i>Siphonaria pectinata</i>       | HQ659934 | DQ279993 | AY377627 | HQ660000 |
| Pyramidelloidea         |                                   |          |          |          |          |
| Odostomiinae            | <i>Odostomia plicata</i>          | GU331938 | GU331928 | GU331948 | GU331957 |
| Turbonillinae           | <i>Turbonilla elegantissima</i>   | GU331941 | GU331931 | GU331951 | GU331960 |
| Glacidorboidea          |                                   |          |          |          |          |
| Glacidorbidae           | <i>Glacidorbis rusticus</i>       | FJ917211 | FJ917227 | FJ917264 | FJ917284 |
| Amphiboloidea           |                                   |          |          |          |          |
| Phallomedusidae         | <i>Phallomedusa solida</i>        | DQ093440 | DQ279991 | DQ093484 | DQ093528 |
| Hygrophila              |                                   |          |          |          |          |
| Latiidae                | <i>Latia neritoides</i>           | EF489339 | EF489359 | EF489307 | EF489384 |
| Acroloxidae             | <i>Acroloxus lacustris</i>        | AY282592 | EF489364 | EF489311 | AY282581 |
| Physidae                | <i>Physa acuta</i>                | AY282600 | EF489368 | AY651219 | AY282589 |
| <b>EUPULMONATA</b>      |                                   |          |          |          |          |
| Systellommatophora      |                                   |          |          |          |          |
| Odostomiinae            | <i>Veronicella cubensis</i>       | HQ659991 | DQ897670 | HQ659925 | HQ660057 |
| Onchidiidae             | <i>Onchidella floridana</i>       | AY427521 | AY427486 | EF489317 | EF489392 |
| Ellobioidea             |                                   |          |          |          |          |
| Otinidae                | <i>Otina ovata</i>                | EF489344 | EF489363 | EF489310 | EF489389 |
| Ellobiidae              | <i>Carychium minimum</i>          | EF489341 | EF489361 | EF489308 | EF489386 |
| Stylommatophora         |                                   |          |          |          |          |
| Arionoidea              | <i>Arion silvaticus</i>           | AY145365 | AY145392 | DQ465822 | AF513018 |
| Limacoidea              | <i>Deroceras reticulatum</i>      | AY145373 | AY145404 | AF238045 | AF239734 |
| Elasmognatha            | <i>Succinea putris</i>            | HQ659993 | AY014057 | HQ659927 | HQ660059 |
| Orthurethra             | <i>Cochlicopa lubrica</i>         | GU331944 | GU331934 | GU331954 | GU331963 |
| <b>Acochliiida</b>      |                                   |          |          |          |          |
| Hedylopsidae            | <i>Hedylopsis spiculifera</i>     | HQ168430 | HQ168443 | HQ168417 | HQ168455 |
|                         | <i>Hedylopsis ballantinei</i>     | HQ168429 | HQ168442 | HQ168416 | HQ168454 |
|                         | <i>Hedylopsis</i> MOTU Moorea     | KF709276 | no data  | KF709247 | KF709354 |
| Hedylopsacea indet.     | Hedylopsacea MOTU Moorea          | KF709277 | KF709320 | no data  | KF709355 |
| Pseudunelidae           | <i>Pseudunela cornuta</i>         | JF819754 | KF709321 | JF819748 | JF819774 |
|                         | <i>Pseudunela viatoris</i>        | JF819751 | KF709322 | JF819741 | JF819766 |
|                         | <i>Pseudunela marteli</i>         | HQ168431 | HQ168444 | HQ168418 | HQ168456 |
|                         | <i>Pseudunela</i> MOTU Maledives  | KF709279 | KF709324 | KF709249 | KF709357 |
|                         | <i>Pseudunela espirotusanta</i>   | JF819755 | KF709325 | JF819749 | JF819775 |
| Acochliiidae            | <i>Strubellia paradoxa</i>        | HQ168432 | HQ168445 | HQ168419 | HQ168457 |
|                         | <i>Strubellia wawrai</i>          | KF709281 | KF709327 | JF819736 | JF819764 |
|                         | <i>Strubellia</i> MOTU Sulawesi   | KF709282 | KF709328 | JF819740 | JF819765 |
|                         | Acochliiidae MOTU Ambon           | KF709283 | KF709329 | KF709250 | KF709358 |
|                         | <i>Palliohedyle</i> MOTU Sulawesi | KF709284 | JF828039 | JF828040 | JF828032 |
|                         | <i>Acochlidium fijense</i>        | HQ168433 | HQ168446 | HQ168420 | HQ168458 |
|                         | <i>Acochlidium amboinense</i>     | KF709285 | KF709330 | KF709251 | KF709359 |
|                         | <i>Acochlidium bayerfehlmanni</i> | KF709286 | no data  | KF709252 | KF709360 |
|                         | <i>Acochlidium sutteri</i>        | KF709287 | KF709331 | KF709253 | KF709361 |

|                |                                     |          |          |          |          |
|----------------|-------------------------------------|----------|----------|----------|----------|
|                | <i>Acochlidium</i> MOTU<br>Solomons | KF709290 | KF709334 | KF709257 | KF709365 |
| Aitengidae     | <i>Aiteng ater</i>                  | JF828036 | JF828037 | JF828038 | JF828031 |
|                | <i>Aiteng mysticus</i>              | HQ168428 | HQ168441 | HQ168415 | HQ168453 |
|                | <i>Aiteng marefugitus</i>           | AB914671 | AB914672 | AB914673 | AB914674 |
| Bathyhedylidae | <i>Bathyhedyle boucheti</i>         | KX721049 | KX721050 | KX721048 | no data  |
| Asperspinidae  | <i>Asperspina brambelli</i>         | KF709291 | JQ410991 | JQ410990 | no data  |
|                | <i>Asperspina rhopalotecta</i>      | KF709292 | KF709335 | KF709259 | no data  |
| Microhedylidae | <i>Microhedyle glandulifera</i>     | HQ168437 | HQ168449 | HQ168424 | HQ168461 |
|                | <i>Microhedyle remanei</i>          | KF709304 | KF709344 | KF709267 | no data  |
|                | <i>Parhedyle cryptophthalma</i>     | KF709308 | JF828041 | JF828042 | JF828033 |
|                | <i>Pontohedyle kepii</i>            | KC984290 | JQ410967 | JQ410966 | JQ410912 |
|                | <i>Pontohedyle wenzli</i>           | KC984294 | JQ410958 | JQ410957 | JQ410907 |
|                | <i>Ganitus evelinae</i>             | KF709312 | JF828044 | JF828045 | JF828034 |
|                | <i>Paraganitus ellynnae</i>         | HQ168436 | HQ168448 | HQ168423 | HQ168460 |
